# Supplementary material for: Tuning the binding behaviors of a protein YAP65WW domain on graphenic nano-sheets with boron or nitrogen atom doping
Source: Royal Society of Chemistry journal article supplement (doi:10.1039/d0na00365d), 2020-01-01
Supplement: d0na00365d1.pdf [file d0na00365d1.pdf]

## Supplementary Information

### **Tuning the Binding Behaviors of Protein YAP65WW Domain on Graphenic Nano-Sheets with Boron or Nitrogen Atom Doping**

Xiao Jia<sup>1</sup>, Yanmei Yang<sup>2\*</sup>, Yang Liu<sup>1</sup>, Weihua Niu<sup>2</sup>, Yong-Qiang Li<sup>1</sup>, Mingwen Zhao<sup>1</sup> Yuguang Mu<sup>3\*</sup> and Weifeng Li<sup>1\*</sup>

1. *School of Physics and State Key Laboratory of Crystal Materials, Shandong University, Jinan, Shandong, 250100, China*
2. *College of Chemistry, Chemical Engineering and Materials Science, Collaborative Innovation Center of Functionalized Probes for Chemical Imaging in Universities of Shandong, Key Laboratory of Molecular and Nano Probes, Ministry of Education, Shandong Normal University, Jinan, 250014, China*
3. *School of Biological Sciences, Nanyang Technological University, 637551, Singapore*

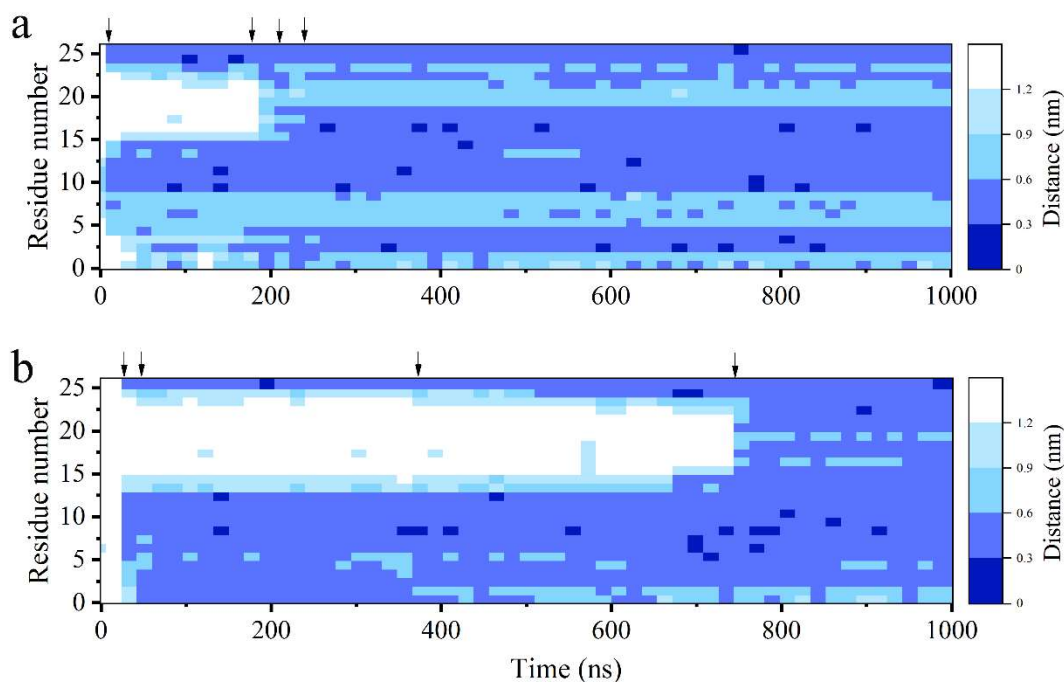

**Figure S1.** The evolutions of the contact state of protein residues with (a) BC<sub>3</sub> and (b) C<sub>3</sub>N. Deep blue indicates formation of intimate contacts.

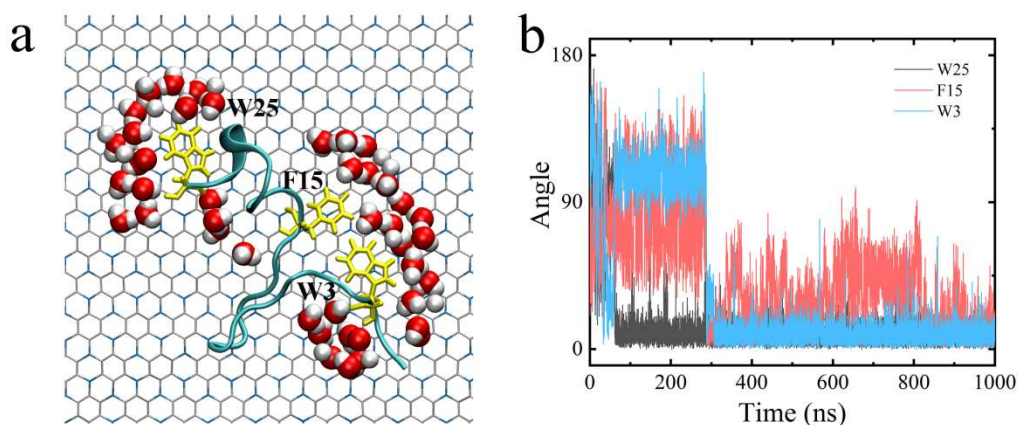

**Figure S2.** (a) The top view of YAP65WW on BC<sub>3</sub> at 1000ns. The water molecules within 0.6nm to both BC<sub>3</sub> and contacting residues (W3, F15 and W25) are shown as spheres. (b) Time evolutions of the stacking angle between contacting aromatic residues (W3, F15 and W25) and the BC<sub>3</sub> sheet. Angles are defined by the normal directions of the aromatic rings and the z-axis (normal direction of BC<sub>3</sub> sheet). Thus, a value of 0 degree represents face-to-face stacking.

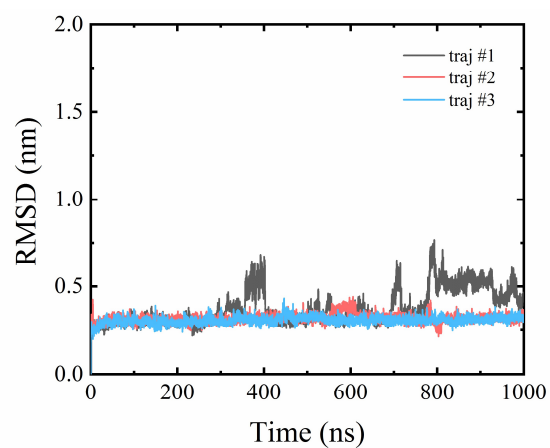

**Figure S3.** Time evolutions of the root-mean-squared deviation (RMSD) of the YAP65WW heavy atoms in water with respect to the crystal structure in three trajectories.

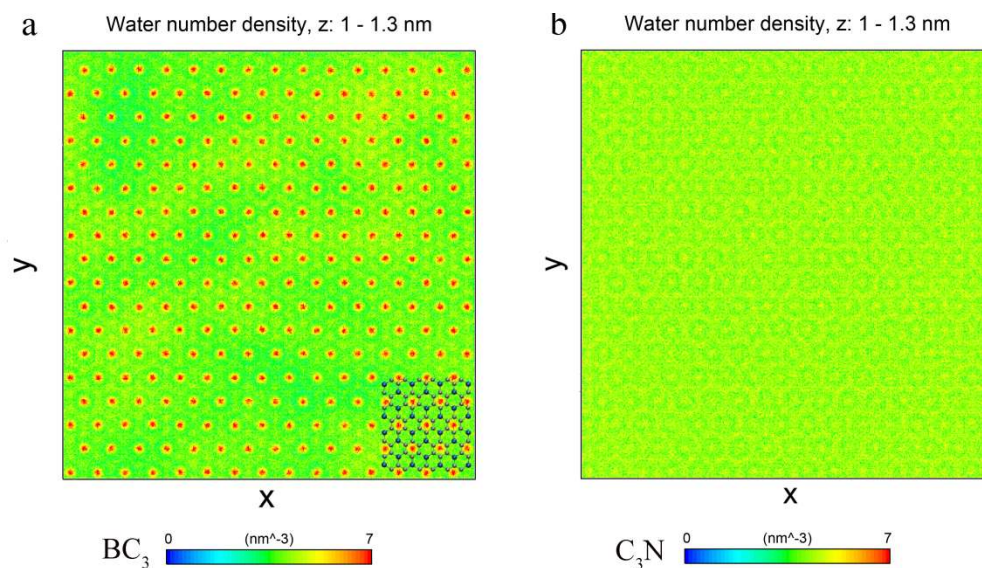

**Figure S4.** Two dimensional density contour map of the solvation water shell of (a)  $BC_3$  and (b)  $C_3N$ .

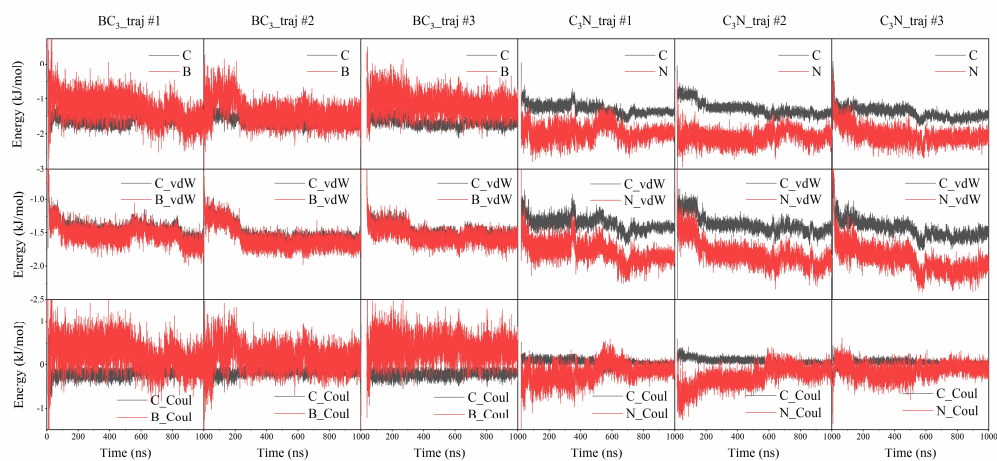

**Figure S5.** The time evolutions of total interaction energy, van der Waals (vdW) and Coulomb (Coul) contributions between protein and atoms in BC<sub>3</sub>/C<sub>3</sub>N.
